# Supplementary material for: Dasatinib (BMS-35482) potentiates the activity of gemcitabine and docetaxel in uterine leiomyosarcoma cell lines
Source: PubMed Central journal article supplement (PMC4877815; doi:10.1186/2053-6844-1-2), 2014-09-30

**p-paxillin/Total paxillin Protein Expression**

**(% of control)**

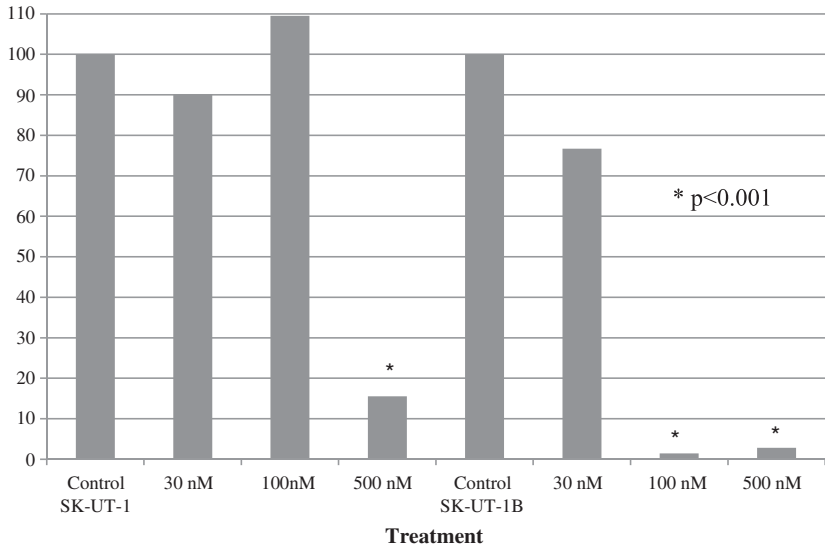

Supplement: 40661_2014_2_MOESM10_ESM.pdf [file 40661_2014_2_MOESM10_ESM.pdf]
